# Supplementary material for: Sensitive enzymatic glucose detection by TiO2nanowire photoelectrochemical biosensors
Source: Royal Society of Chemistry journal article supplement (doi:10.1039/c3ta14173j), 2013-11-12
Supplement: c3ta14173j.pdf [file c3ta14173j.pdf]

Supporting Information for

# "Sensitive Enzymatic Glucose Detection by TiO<sub>2</sub> Nanowire Photoelectrochemical Biosensors"

*Jing Tang,<sup>a,†</sup> Yongcheng Wang,<sup>a,†</sup> Jun Li,<sup>b</sup> Peimei Da,<sup>a</sup> Jing Geng,<sup>a</sup> and Gengfeng Zheng<sup>a,\*</sup>*

<sup>a</sup> *Address: Laboratory of Advanced Materials, Department of Chemistry, Fudan University, Shanghai, 200433, People's Republic of China*

<sup>b</sup> *Address: School of Pharmacy, Fudan University, Shanghai, 201203, People's Republic of China*

*\* E-mail: gfzheng@fudan.edu.cn (G.Z.)*

*† J.T. and Y.W. contributed equally to this work.*

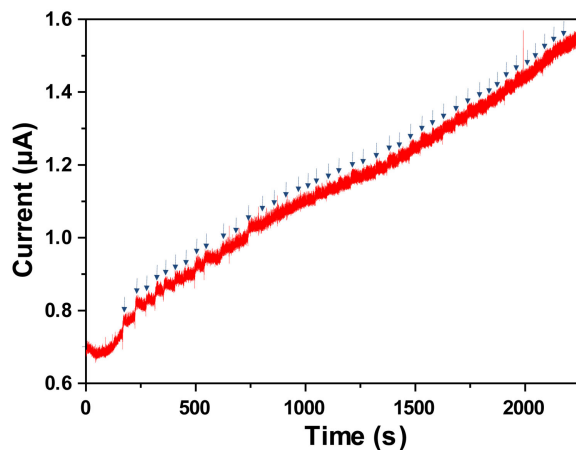

**Figure S1.** Photocurrent vs. time data of a GOx-functionalized TiO<sub>2</sub> nanoparticle (P25) PEC sensor for successive addition of glucose at 0.3 V vs. Ag/AgCl under sun light illumination. Each arrow indicates the addition of glucose into buffer, with a final glucose concentration increase of 200 µM each time.

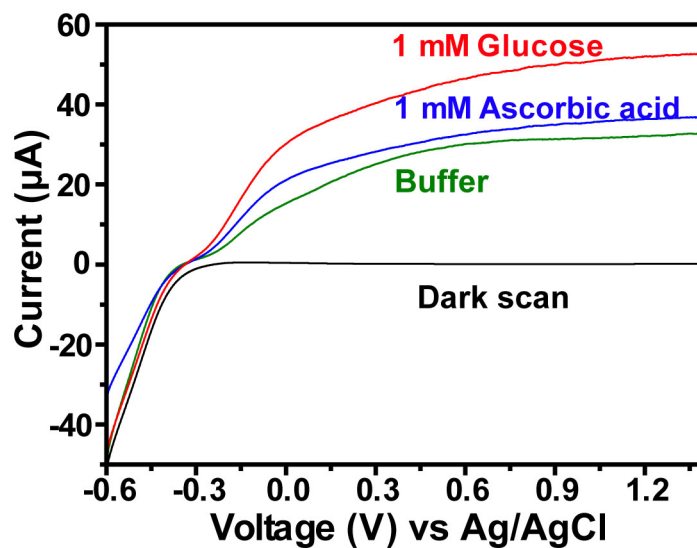

**Figure S2.** Line sweep voltammograms of photocurrent for a TiO<sub>2</sub>-GOx NW biosensor under PBS buffer (green curve), 1 mM ascorbic acid (blue curve), and 1 mM glucose (red curve). The dark current of the TiO<sub>2</sub>-GOx NWs is also plotted (black curve) for comparison.

**Table S1.** Comparison of photoelectrochemical glucose sensing performance of the present work with previously reported methods.

| <b>Methods</b>                                                            | <b>Linear Range</b> | <b>Detection Limit</b> | <b>Reference</b> |
|---------------------------------------------------------------------------|---------------------|------------------------|------------------|
| GOx-functionalized TiO <sub>2</sub> nanowires                             | 0.15 – 1000 μM      | 0.9 nM                 | Present work     |
| GOx/CdS nanoparticles                                                     | 1 μM – 2.5 mM       | 1 μM                   | S1               |
| Glucose oxidase (GOx)/zinc oxide                                          | 0 – 25 mM           | 5.6 μM                 | S2               |
| TiO <sub>2</sub> /CdSe@CdS QD nanocomposite with glucose oxidase          | 1 – 10 mM           | < 0.05 mM              | S3               |
| Hemin/G-Quadruplex-stimulated chemiluminescence resonance energy transfer | 5 – 40 mM           | < 10 mM                | S4               |
| Anatase TiO <sub>2</sub> modified electrode                               | 0.02 – 5.0 mM       | 0.02 mM                | S5               |
| WO <sub>3</sub> nanoparticles decorated core-shell TiC-C nanofiber arrays | 1 – 10 μM           | 11.2 nM                | S6               |
| Nickel oxide nanoflake arrays                                             | 10 – 800 μM         | 1.2 μM                 | S7               |

**References:**

- (S1) J. Sun, Y. Zhu, X. Yang and C. Li, *Particuology*, 2009, **7**, 347-352.
- (S2) X. Ren, D. Chen, X. Meng, F. Tang, X. Hou, D. Han and L. Zhang, *J. Colloid Interface Sci.* 2009, **334**, 183-187.
- (S3) M. Zheng, Y. Cui, X. Li, S. Liu and Z. Tang, *J. Electroanal. Chem.*, 2011, **656**, 167-173.
- (S4) E. Golub, A. Niazov, R. Freeman, M. Zatspein and I. Willner, *J. Phys. Chem. C*, 2012, **116**, 13827-13834.
- (S5) Y. Yan, J. Fang, Z. Yang, J. Qiao, Z. Wang, Q. Yu and K. Sun, *Chem. Commun.*, 2013, **49**, 8632-8634.

- (S6) X. Zhang, K. Huo, X. Peng, R. Xu, P. Li, R. Chen, G. Zheng, Z. Wu and P. K. Chu, *Chem. Commun.*, 2013, **49**, 7091-7093.
- (S7) G. Wang, X. Lu, T. Zhai, Y. Ling, H. Wang, Y. Tong and Y. Li, *Nanoscale*, 2012, **4**, 3123-3127.
